# Supplementary material for: How does roadside vegetation management affect the diversity of vascular plants and invertebrates? A systematic review
Source: Springer Nature journal article supplement (doi:10.1186/s13750-018-0129-z), 2018-07-11
Supplement: MOESM2 [file 13750_2018_129_MOESM2_ESM.xlsx]

## Sheet: Blad1
Additional file 2. Articles excluded as irrelevant to the review
	Reasons for exclusion
	Intervention	Not a study of roadside management based on relevant interventions
	Comparator	No usable comparator data
	Outcomes	No usable data on biodiversity of plants or invertebrates
	Study type	Not an observational field study
	Language	Full text not in English, Danish, Dutch, French, German, Norwegian, Spanish or Swedish
	Not found	Article not found in full text
Articles from systematic map excluded based on reassessment
Authors	Year	Title	Journal/Book title/Publisher	Volume	Pages	Reason for exclusion
Kiviniemi K; Eriksson O	1999	Dispersal, recruitment and site occupancy of grassland plants in fragmented habitats	Oikos	86	241-253	Intervention
Tanner A L; Leroux S J	2015	Effect of roadside vegetation cutting on moose browsing	PLoS ONE	10(8):e0133155	1-15	Outcomes
Tompkins R D; Stucky J M	2000	Microhabitat study of Lotus unifoliatus var. helleri: Microdistribution, associated species, and potential effects of roadside mowing	Castanea	65	213-220	Intervention
Yates C J; Broadhurst L M	2002	Assessing limitations on population growth in two critically endangered Acacia taxa	Biological Conservation	108	13-26	Outcomes
Young S L; Claassen V P	2008	Native perennial grasses in highway medians: Pre- and postplant techniques for establishment in a Mediterranean climate	Invasive Plant Science and Management	1	368-375	Intervention
Articles from search update excluded based on full-text reading
Authors	Year	Title	Journal/Book title/Publisher	Volume	Pages	Reason for exclusion
Auestad I ; Rydgren K ; Austad I	2016	Near-natural methods promote restoration of species-rich grassland vegetation - revisiting a road verge trial after 9 years	Restoration Ecology	24	381-389	Intervention
Bacaro G ; Maccherini S ; Chiarucci A ; Jentsch A ; Rocchini D ; Torri D ; Gioria M ; Tordoni E ; Martellos S ; Altobelli A ; Otto R ; Escudero C G; Fernández-Lugo S ; Fernández-Palacios J M; Arévalo J R	2015	Distributional patterns of endemic, native and alien species along a roadside elevation gradient in Tenerife, Canary Islands	Community Ecology	16	223-234	Intervention
Baum K A; Mueller E K	2015	Grassland and roadside management practices affect milkweed abundance and opportunities for monarch recruitment	Monarchs in a changing world (ed. Oberhauser Karen S; Nail Kelly R; Altizer Sonia), Cornell University Press		197-202	Comparator
Bertz C A; Menges E S	2016	Growth patterns of roadside torpedograss populations within xeric Florida scrub	Castanea	81	194-205	Intervention
Cordero R L; Torchelsen F P; Overbeck G E; Anand M	2016	Analyzing the landscape characteristics promoting the establishment and spread of gorse (Ulex europaeus) along roadsides	Ecosphere	7: e01201		Intervention
Culley T M; Huebner C D; Novy A	2016	Regional and local genetic variation in Japanese stiltgrass (Microstegium vimineum)	Invasive Plant Science and Management	9	96-111	Intervention
Deubert M ; Trapp M ; Krohn K ; Ullrich K ; Bolz H ; Künast R ; Künast C	2016	The “Eh da”-concept: Towards greater biodiversity in agricultural landscapes and settlement areas	Naturschutz und Landschaftsplanung	48	209-217	Outcomes
Dostálek J ; Frantík T ; Šilarová V	2016	Changes in the distribution of alien plants along roadsides in relation to adjacent land use over the course of 40 years	Plant Biosystems	150	442-448	Intervention
Edwards F A; Finan J ; Graham L K; Larsen T H; Wilcove D S; Hsu W W; Chey V K; Hamer K C	2017	The impact of logging roads on dung beetle assemblages in a tropical rainforest reserve	Biological Conservation	205	85-92	Intervention
Engelhardt Katharina A M; Hawkins Kara	2016	Identification of low growing, salt tolerant turfgrass species suitable for use along highway right of way	Maryland Department of Transportation	MD-16-SHA-UMCES-6-3		Study type
Fernandes G W; Santos R ; Barbosa N P U; Almeida H A; Carvalho V ; Angrisano P	2015	Occurrence of non-native and exotic plants in restored areas of rupestrian grasslands	Planta Daninha	33	463-482	Language
Gardner H W	2016	Seed dispersal by roadside mowing	Natural Areas Journal	36	102-104	Not found
Goodwin C ; Keep B ; Leather S R	2017	Habitat richness and tree species richness of roundabouts: effects on site selection and the prevalence of arboreal caterpillars	Urban Ecosystems	20	889-895	Intervention
Heneberg P ; Bogusch P ; Řezáč M	2017	Roadside verges can support spontaneous establishment of steppe-like habitats hosting diverse assemblages of bees and wasps (Hymenoptera: Aculeata) in an intensively cultivated central European landscape	Biodiversity and Conservation	26	843-864	Intervention
Hopkinson L ; Hilvers G ; Davis E	2015	Development of erosion control seed mixtures for West Virginia	American Society of Agricultural and Biological Engineers Annual International Meeting 2015		760-765	Not found
Hopkinson L C; Davis E ; Hilvers G	2016	Vegetation cover at right of way locations	Transportation Research Part D: Transport and Environment	43	28-39	Intervention
Hopwood Jennifer ; Black Scott ; Fleury Scott	2015	Roadside best management practices that benefit pollinators: Handbook for supporting pollinators through roadside maintenance and landscape design	Federal Highway Administration	FHWA-HEP-16-059		Study type
Hopwood Jennifer ; Black Scott Hoffman; Fleury Scott	2016	Pollinators and roadsides: Best management practices for managers and decision makers	Federal Highway Administration			Study type
Huang X R; Pang S L; Shen W H; Hou Y R; He F	2016	Herb diversity and its affecting factors of community invaded by Praxelis clematidea in karst mountainous area of Guangxi Province, China	Chinese Journal of Applied Ecology	27	815-821	Language
Jaźwa M ; Heise W ; Klimek B	2016	Substrate factors determine roadside vegetation structure and species richness: A case study along a meridional gradient in Fennoscandia	Bulletin of Environmental Contamination and Toxicology	97	554-560	Intervention
Jeffries M D; Gannon T W; Yelverton F H	2017	Herbicide inputs and mowing affect vaseygrass (Paspalum urvillei) control	Weed Technology	31	120-129	Not found
Kadej M ; Zając K ; Smolis A ; Tarnawski D ; Malkiewicz A	2016	Isolation from forest habitats reduces chances of the presence of Osmoderma eremita sensu lato (Coleoptera, Scarabaeidae) in rural avenues	Journal of Insect Conservation	20	395-406	Intervention
Kasten K ; Stenoien C ; Caldwell W ; Oberhauser K S	2016	Can roadside habitat lead monarchs on a route to recovery?	Journal of Insect Conservation	20	1047-1057	Intervention
King J R; Tschinkel W R	2016	Experimental evidence that dispersal drives ant community assembly in human-altered ecosystems	Ecology	97	236-249	Intervention
Koppenhöfer A M; Kostromytska O S; McGraw B A; Ebssa L	2015	Entomopathogenic nematodes in turfgrass: Ecology and management of important insect pests in North America	Nematode Pathogenesis of Insects and Other Pests: Ecology and Applied Technologies for Sustainable Plant and Crop Protection, (ed. Campos-Herrera R)		309-327	Study type
Kütt L ; Lõhmus K ; Rammi I J; Paal T ; Paal J ; Liira J	2016	The quality of flower-based ecosystem services in field margins and road verges from human and insect pollinator perspectives	Ecological Indicators	70	409-419	Intervention
Lili D ; Lianxian G	2016	Ecological remediation study on roadside vegetation around highways in frigid mountainous areas at high altitude - Taking G317 state road as a case study	International Journal of Earth Sciences and Engineering	9	319-326	Not found
Liu X ; Bao W ; Hu B ; Feng D ; Pang X ; Ding J ; Wu Z	2016	Plant species selection and adaptivity for vegetation restoration of alpine roadside slopes	Chinese Journal of Applied and Environmental Biology	22	1015-1022	Language
Mardones D ; Fuentes N ; Saldaña A	2015	Comparison of the severity of invasion associated to pathways with different disturbance levels in a temperate rainforest in southern Chile	Gayana - Botanica	72	221-230	Intervention
McCullough Patrick ; Shilling Donn	2015	Enhancing extension education and recommendations on vegetation management for the Georgia DOT	Georgia Department of Transportation			Intervention
McCullough Patrick ; Shilling Donn	2015	Enhancing extension education recommendations to minimize spread of invasive species and establish new grasses for Georgia roadsides	Georgia Department of Transportation	FHWA-GA-16-1237		Intervention
Nowak Christopher A	2015	Integrated vegetation management program enhancements: Final report	New York State Department of Transportation			Intervention
Nowak Christopher A	2015	A brief survey of strategic planning elements for Department of Transportation vegetation management programs	New York State Department of Transportation	C-06-24		Study type
Okimura T ; Koide D ; Mori A S	2016	Differential processes underlying the roadside distributions of native and alien plant assemblages	Biodiversity and Conservation	25	995-1009	Intervention
O'Sullivan O S; Holt A R; Warren P H; Evans K L	2017	Optimising UK urban road verge contributions to biodiversity and ecosystem services with cost-effective management	Journal of Environmental Management	191	162-171	Study type
Palfi Z ; Spooner P G; Robinson W	2017	Soil disturbance effects on the composition of seed-dispersing ants in roadside environments	Oecologia	183	493-503	Comparator
Pellegrini E ; Falcone L ; Loppi S ; Lorenzini G ; Nali C	2016	Impact of mechanical mowing and chemical treatment on phytosociological, pedochemical and biological parameters in roadside soils and vegetation	Ecotoxicology	25	279-290	Comparator
Pliszko A ; Jazwa M	2017	Floristic composition of vegetation in habitats suitable for Erigeron × huelsenii (Asteraceae)	Acta Botanica Croatica	76	9-14	Intervention
Rewicz A ; Jaskuła R ; Rewicz T ; Tończyk G	2017	Pollinator diversity and reproductive success of Epipactis helleborine (L.) Crantz (Orchidaceae) in anthropogenic and natural habitats	PeerJ	5: e3159		Intervention
Rhoden C M; Taylor C A; Peterman W E	2016	Highway to heaven? Roadsides as preferred habitat for two narrowly endemic crayfish	Freshwater Science	35	974-983	Intervention
Romig Douglas ; McNaughton Cam ; Kern John	2016	Assessing the potential to sequester carbon within state highway rights-of-way in New Mexico. Phase 2: Development of a right-of-way carbon sequestration program	New Mexico Department of Transportation Research Bureau	NM10ENV-01		Intervention
Rubenstein S M; Dechaine J M	2015	Native-nonnative seed dispersal and establishment along an interstate highway	Northwest Science	89	324-335	Intervention
Schwerk A ; Dymitryszyn I	2016	Impact of taxonomic resolution on the indicatory information: Studies on carabid beetles in Poland	Polish Journal of Ecology	64	255-267	Not found
Sosa A J; Cardo M V; Julien M H	2017	Predicting weed distribution at the regional scale in the native range: Environmental determinants and biocontrol implications of Phyla nodiflora (Verbenaceae)	Weed Research	57	193-203	Intervention
Torma A ; Bozsó M	2016	Effects of habitat and landscape features on grassland Orthoptera on floodplains in the lower reaches of the Tisza River Basin	European Journal of Entomology	113	60-69	Intervention
Tye M R; Menges E S; Weekley C ; Quintana-Ascencio P F; Salguero-Gómez R	2016	A demographic ménage à trois: interactions between disturbances both amplify and dampen population dynamics of an endemic plant	Journal of Ecology	104	1778-1788	Intervention
Vakhlamova T ; Rusterholz H P; Kanibolotskaya Y ; Baur B	2016	Effects of road type and urbanization on the diversity and abundance of alien species in roadside verges in Western Siberia	Plant Ecology	217	241-252	Intervention
van Halder I ; Thierry M ; Villemey A ; Ouin A ; Archaux F ; Barbaro L ; Balent G ; Benot M L	2017	Trait-driven responses of grassland butterflies to habitat quality and matrix composition in mosaic agricultural landscapes	Insect Conservation and Diversity	10	64-77	Intervention
Villemey A ; Peterman W E; Richard M ; Ouin A ; van Halder I ; Stevens V M; Baguette M ; Roche P ; Archaux F	2016	Butterfly dispersal in farmland: a replicated landscape genetics study on the meadow brown butterfly (Maniola jurtina)	Landscape Ecology	31	1629-1641	Intervention
Wrzesien M ; Denisow B	2016	Distribution and abundance of bee forage flora across an agricultural landscape - Railway embankments vs. road verges	Acta Societatis Botanicorum Poloniae	85: 3509		Intervention
Zielinska K M; KiedrzyNski M ; Grzyl A ; Rewicz A	2016	Forest roadsides harbour less competitive habitats for a relict mountain plant (Pulsatilla vernalis) in lowlands	Scientific Reports	6: 31913		Intervention
