# Supplementary material for: How does roadside vegetation management affect the diversity of vascular plants and invertebrates? A systematic review
Source: Springer Nature journal article supplement (doi:10.1186/s13750-018-0129-z), 2018-07-11
Supplement: MOESM3 [file 13750_2018_129_MOESM3_ESM.xlsx]

## Sheet: Excluded studies
Additional file 3. Studies excluded due to low or unclear validity
	Reason for exclusion
		Low validity
	Conf	Severely confounding factors present
	Match	Intervention and comparator sites not well-matched
	Repl	No true replication
		Unclear validity
	IntD	Intervention data difficult to interpret
	Meth	Methodological description insufficient
Authors	Year	Title	Journal/Book/ Publisher	Volume	Pages	Study identification (for articles with multiple studies)	Reason for exclusion
Adams P P; Blaser R E	1979	Improving vegetation and mowing management in highway corridors	Virginia Polytechnic Institute and State University	VHTRC 79-R63		2.3.1	Conf
Ahrens C W; Meyer T H; Auer C A	2014	Distribution models for Panicum virgatum (Poaceae) reveal an expanded range in present and future climate regimes in the northeastern United States	American Journal of Botany	101	1886-1894		IntD
Arteaga M A; Delgado J D; Otto R; Fernández-Palacios J M; Arévalo J R	2009	How do alien plants distribute along roads on oceanic islands? A case study in Tenerife, Canary Islands	Biological Invasions	11	1071-1086		IntD
Bowmer W J; McCully W G	1968	Establishment of Bermudagrass seeded with annual ryegrass	Texas Transportation Institute	67-7			Meth
Brown C S; Rice K J	2001	Inputs and maintenance for revegetation with native herbaceous species	California Department of Transportation	FHWA/CA/TL-2001/06		Chapter 2	Meth
Bugg R L; Brown C S; Anderson J H	1997	Restoring native perennial grasses to rural roadsides in the Sacramento Valley of California: Establishment and evaluation	Restoration Ecology	5	214-228		Conf
Busby R	2014	Native vegetation establishment for IDOT erosion control best management practices	Illinois Department of Transportation	FHWA-ICT-14-0111			Conf, Match
de Kroon H; Plaisier A; van Groenendael J	1987	Density dependent simulation of the population dynamics of a perennial grassland species, Hypochaeris radicata	Oikos	50	3-12		Meth
Edgar R	2000	Evaluation of infrared treatments for managing roadside vegetation	Oregon Department of Transportation	SPR 376			Conf
Gannon T; Yelverton F H	2007	Application placement technologies for vegetation management on North Carolina roadsides	North Carolina State University	FHWA/NC/2006-42			Match, Meth
Gannon T; Yelverton F; Jeffries M	2016	Asset management aided through vegetation management/zoysiagrass along NC roadsides	NC Department of Transportation, Roadside Environmental Unit	FHWA/NC/2013-17			IntD
Gardiner T; Vaughan A	2009	Hay mowing and scrub clearance enhance floristic species richness on a green lane in Norwood End, Essex, England	Conservation Evidence	6	62-65		Repl
Gardiner T; Vaughan A	2009	Scrub clearance enhances floristic species richness on a green lane with restricted motorised vehicular access in Stanford Rivers, Essex, England	Conservation Evidence	6	79-82		Repl
Gilfedder L; Kirkpatrick J B	1997	Aspects of the distribution, phytosociology, ecology and management of Danthonia popinensis D.I. Morris, an endangered wallaby grass from Tasmania	Papers and Proceedings of the Royal Society of Tasmania	131	31-35		Repl
Gosper C R; Yates C J; Prober S M; Williams M R	2011	Fire does not facilitate invasion by alien annual grasses in an infertile Australian agricultural landscape	Biological Invasions	13	533-544		Meth
Hixson Adam C; Gannon Travis W; Yelverton Fred H	2007	Efficacy of application placement equipment for tall fescue (Lolium arundinaceum) growth and seedhead suppression	Weed Technology	21	801-806		IntD, Meth
Hopwood J L	2008	The contribution of roadside grassland restorations to native bee conservation	Biological Conservation	141	2632-2640		Conf
Jacot K; Eggenschwiler L; Beerli C; Bosshard A; Suter M	2012	Significance of different types of meadow edges for plant diversity in the Swiss Alps	Agriculture, Ecosystems & Environment	153	75-81		Conf
Jakobsson S; Fukamachi K; Cousins S A O	2016	Connectivity and management enables fast recovery of plant diversity in new linear grassland elements	Journal of Vegetation Science	27	19-28		IntD
Jauni M; Hyvönen T	2010	Invasion level of alien plants in semi-natural agricultural habitats in boreal region	Agriculture, Ecosystems & Environment	138	109-115		Match, IntD
Jellinek S; Parris K M; Driscoll D A	2013	Are only the strong surviving? Little influence of restoration on beetles (Coleoptera) in an agricultural landscape	Biological Conservation	162	17-23		IntD
Johnson J M; Lloyd K L; Sellmer J C; Gover A E	2010	Comparison of Japanese knotweed control methods	Roadside Vegetation Management Research, Pennsylvania Dept. of Transportation	2010 Report	12-14		Conf
Joly M; Bertrand P; Gbangou R Y; White M-C; Dubé J; Lavoie C	2011	Paving the way for invasive species: Road type and the spread of Common ragweed (Ambrosia artemisiifolia)	Environmental Management	48	514-522		IntD
Korres N E; Norsworthy J K; Bagavathiannan M V; Mauromoustakos A	2015	Distribution of arable weed populations along eastern Arkansas-Mississippi delta roadsides: Factors affecting weed occurrence	Weed Technology	29	596-604		IntD
Kuussaari M; Heliölä J; Luoto M; Pöyry J	2007	Determinants of local species richness of diurnal Lepidoptera in boreal agricultural landscapes	Agriculture, Ecosystems & Environment	122	366-376		Match, IntD
McDonald P M; Litton R B	1998	Combining silviculture and landscape architecture to enhance the roadside view	USDA Forest Service Pacific Southwest Research Station	PSW-RP-235			Meth
McDougall K L	2001	Colonization by alpine native plants of a stabilized road verge on the Bogong High Plains, Victoria	Ecological Management & Restoration	2	47-52		Conf
McDougall K L	2013	Alpine road colonisation: An update	Ecological Management & Restoration	14	66-68		Conf
Milberg P; Lamont B B	1995	Fire enhances weed invasion of roadside vegetation in southwestern Australia	Biological Conservation	73	45-49		Match
Morré D J	1977	A low-cost maintenance program for Indiana roadsides	Purdue University	JHRP-77-13		Part 1, study 4	Meth
Morré D J	1977	A low-cost maintenance program for Indiana roadsides	Purdue University	JHRP-77-13		Part 3, study 1	Meth
O'Dell R E; Young S L; Claassen V P	2007	Native roadside perennial grasses persist a decade after planting in the Sacramento Valley	California Agriculture	61	79-84		Conf, Meth
Schaffers A P	2000	Ecology of roadside plant communities	Wageningen University (Ph.D. thesis)				Match
Simões M P; Belo A F; Souza C	2013	Effects of mowing regime on diversity of Mediterranean roadside vegetation - implications for management	Polish Journal of Ecology	61	241-255		Match
Skórka P; Lenda M; Moroń D; Kalarus K; Tryjanowski P	2013	Factors affecting road mortality and the suitability of road verges for butterflies	Biological Conservation	159	148-157		IntD
Skórka P; Lenda M; Moroń D; Martyka R; Tryjanowski P; Sutherland W J	2015	Biodiversity collision blackspots in Poland: Separation causality from stochasticity in roadkills of butterflies	Biological Conservation	187	154-163		IntD
Sullivan J J; Williams P A; Timmins S M; Smale M C	2009	Distribution and spread of environmental weeds along New Zealand roadsides	New Zealand Journal of Ecology	33	190-204		IntD
Tikka P M; Koski P S; Kivelä R A; Kuitunen M T	2000	Can grassland plant communities be preserved on road and railway verges?	Applied Vegetation Science	3	25-32		Conf
Weiermans J; van Aarde R J	2003	Roads as ecological edges for rehabilitating coastal dune assemblages in northern KwaZulu-Natal, South Africa	Restoration Ecology	11	43-49		IntD
Wynhoff I; van Gestel R; van Swaay Ch; van Langevelde F	2011	Not only the butterflies: managing ants on road verges to benefit Phengaris (Maculinea) butterflies	Journal of Insect Conservation	15	189-206		IntD
Young S L; Claassen V P	2008	Native perennial grasses in highway medians: Pre- and postplant techniques for establishment in a Mediterranean climate	Invasive Plant Science and Management	1	368-375		Repl
